# Supplementary material for: De una mala transfusión de paz a una buena transfusión de guerra
Source: MDPI journal article supplement (doi:10.3390/antibiotics11020282), 2010-01-01
Supplement: s1 [file s1]

Supporting Information

# A Double Payload Complex between Hypericin and All-*trans* Retinoic Acid in the $\beta$ -Lactoglobulin Protein

Beatriz Rodríguez-Amigo <sup>1,†</sup>, Cormac Hally <sup>1,2,†</sup>, Núria Roig-Yanovsky <sup>1</sup>, Pietro Delcanale <sup>2</sup>, Stefania Abbruzzetti <sup>2</sup>, Montserrat Agut <sup>1</sup>, Cristiano Viappiani <sup>2,\*</sup> and Santi Nonell <sup>1,\*</sup>

- <sup>1</sup> Institut Químic de Sarrià, Universitat Ramon Llull, 08017 Barcelona, Spain; beatrizrodrigueza@iqs.url.edu (B.R.-A.); cormachallyg@iqs.url.edu (C.H.), nroigy@iqs.url.edu (N.R.-Y.), montserrat.agut@iqs.url.edu (M.A.)
- <sup>2</sup> Dipartimento di Scienze Matematiche, Fisiche e Informatiche, Università di Parma, 43124 Parma, Italy; pietro.delcanale@unipr.it (P.D.); stefania.abbruzzetti@unipr.it (S.A.)
- \* Correspondence: cristiano.viappiani@unipr.it (C.V.); santi.nonell@iqs.url.edu (S.N.)
- † These authors contributed equally to this work.

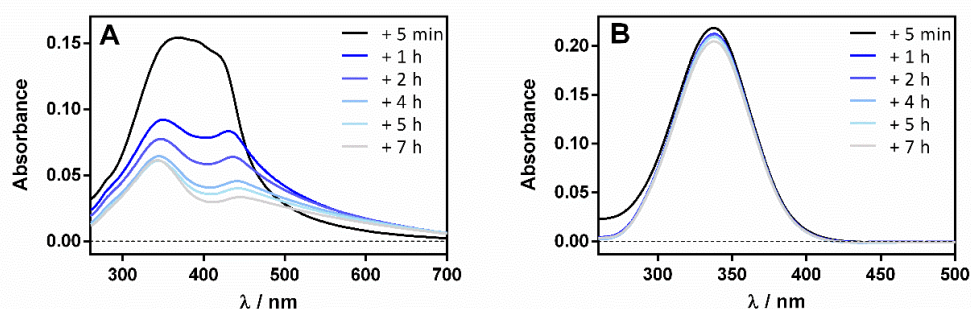

**Figure S1.** Time evolution of the absorption spectrum of 1.7  $\mu$ M RA in A) water and B) EtOH.

**Citation:** Rodríguez-Amigo, B.; Hally, C.; Roig-Yanovsky, N.; Delcanale, P.; Abbruzzetti, S.; Agut, M.; Viappiani, C.; Nonell, S. A Double Payload Complex between Hypericin and All-*trans* Retinoic Acid in the  $\beta$ -Lactoglobulin Protein. *Antibiotics* **2022**, *11*, 282. <https://doi.org/10.3390/antibiotics11020282>

Academic Editor: Marina DellaGrecia

Received: 31 December 2021

Accepted: 17 February 2022

Published: 21 February 2022

**Publisher's Note:** MDPI stays neutral with regard to jurisdictional claims in published maps and institutional affiliations.

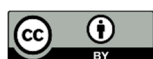

**Copyright:** © 2022 by the authors. Licensee MDPI, Basel, Switzerland. This article is an open access article distributed under the terms and conditions of the Creative Commons Attribution (CC BY) license (<https://creativecommons.org/licenses/by/4.0/>).

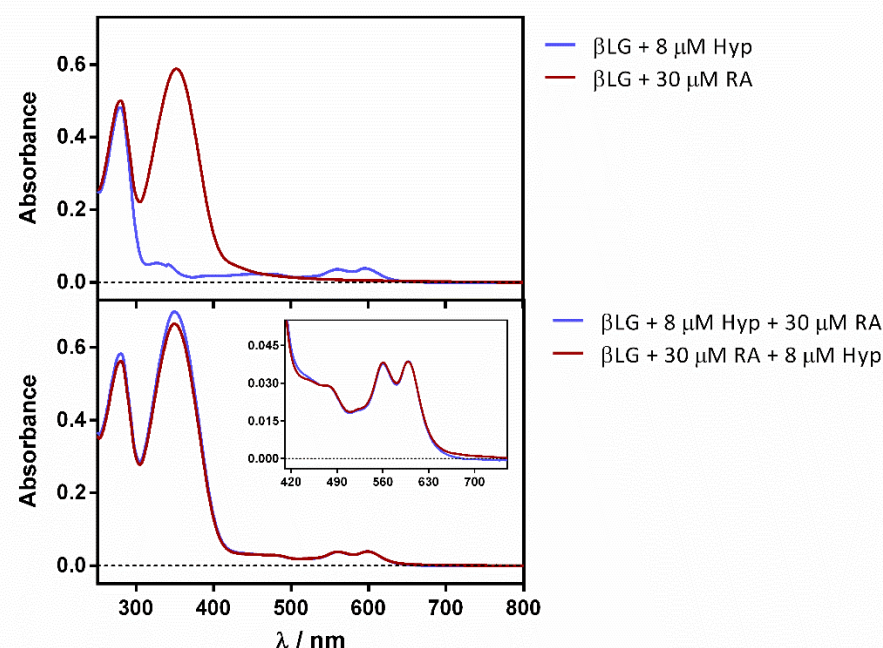

**Figure S2.** Absorption spectra of Hyp-RA- $\beta$ LG mixtures, obtained after adding the components in

different order. 30  $\mu$ M of RA (blue line) were added upon 60  $\mu$ M of  $\beta$ LG and 8  $\mu$ M of Hyp, and vice versa.

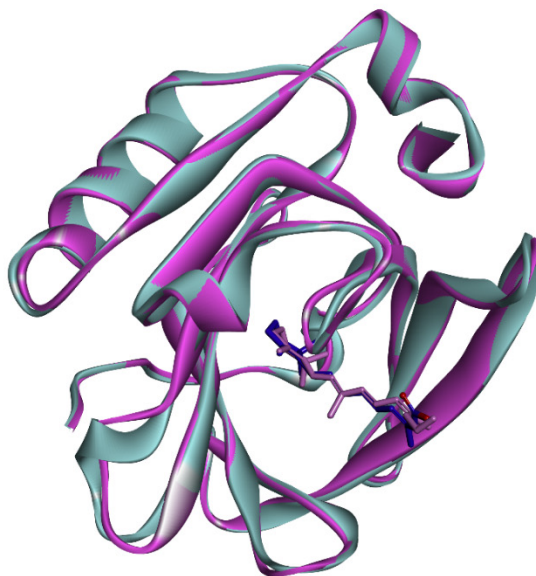

**Figure S3.** Crystal structures of the complex between retinoic acid and  $\beta$ -lactoglobulin (PDB 1GX9) and between retinol and  $\beta$ -lactoglobulin (PDB 1GX8). For 1GX9, the protein structure is represented as light blue solid ribbon, retinoic acid is represented as blue sticks. For 1GX8, the protein structure is represented as magenta solid ribbon, retinol is represented as magenta sticks.

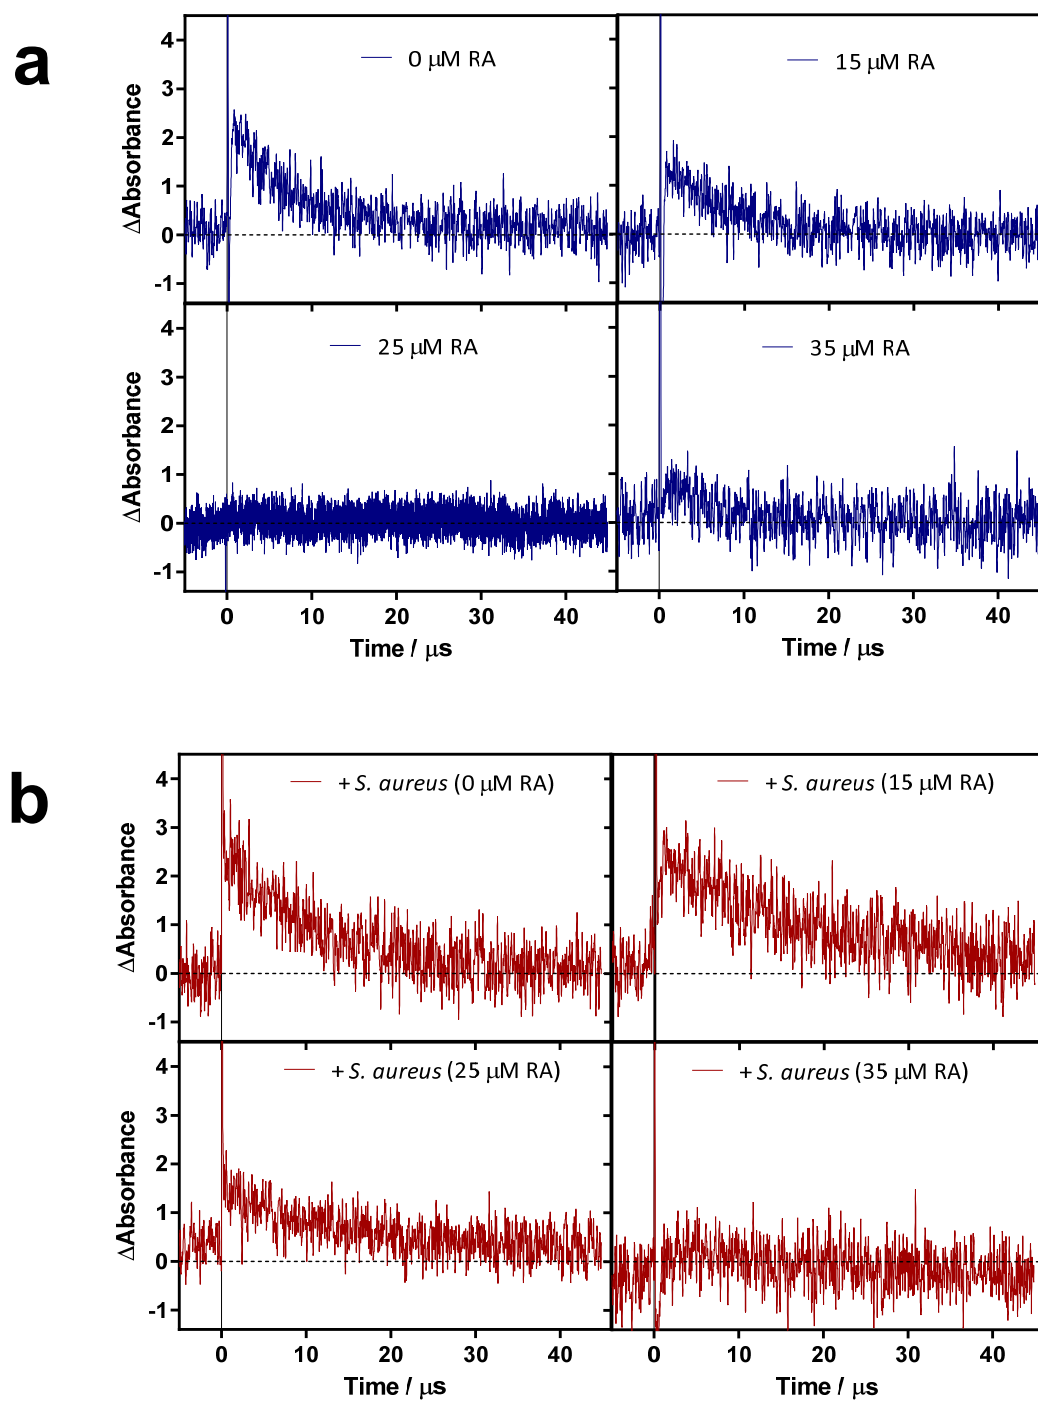

**Figure S4.** Triplet absorption decay of Hyp- $\beta$ LG complexes in the absence (a) and presence (b) of *S. aureus*. Solutions containing 60  $\mu$ M  $\beta$ LG and 15  $\mu$ M Hyp and different RA concentrations were incubated with *S. aureus* cells for 30 minutes. Transients were acquired at 520 nm after pulsed-laser excitation at 532 nm averaging 100 shots.

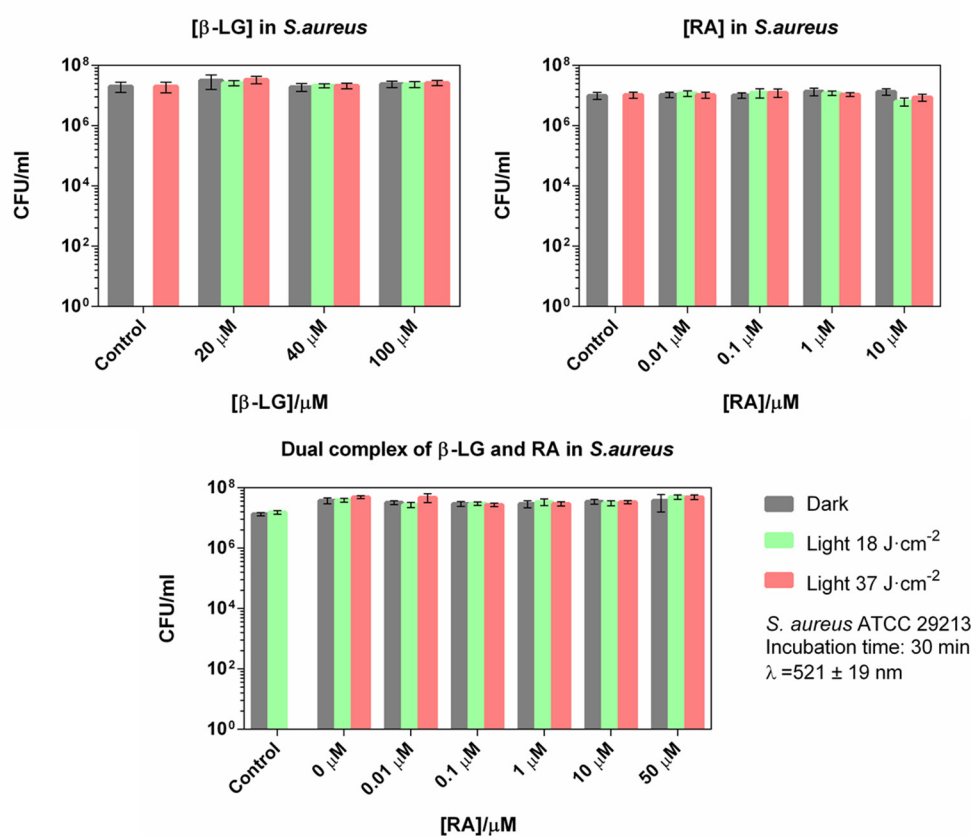

**Figure S5.** Photoinactivation of *S. aureus* with βLG (Top left), retinoic Acid (Top Right) and the dual complex βLG-RA (Bottom) using green light.

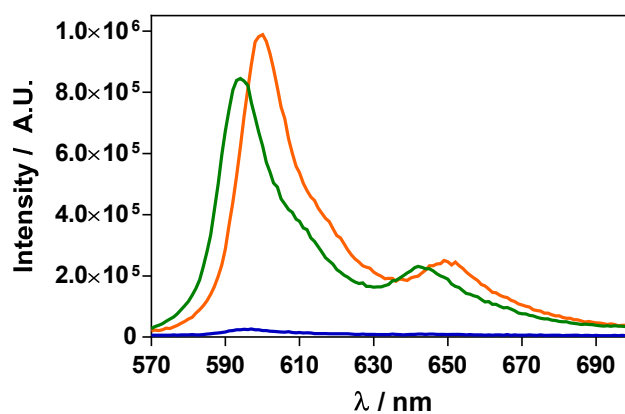

**Figure S6.** Fluorescence spectra of *S. aureus* incubated with the ternary complex βLG-RA-Hyp immediately after incubation without washing the supernatant (green), resuspending the pellet in PBS after the first centrifugation (blue) and the final pellet resuspended in DMSO after centrifugation (orange). Samples were excited at 550 nm.

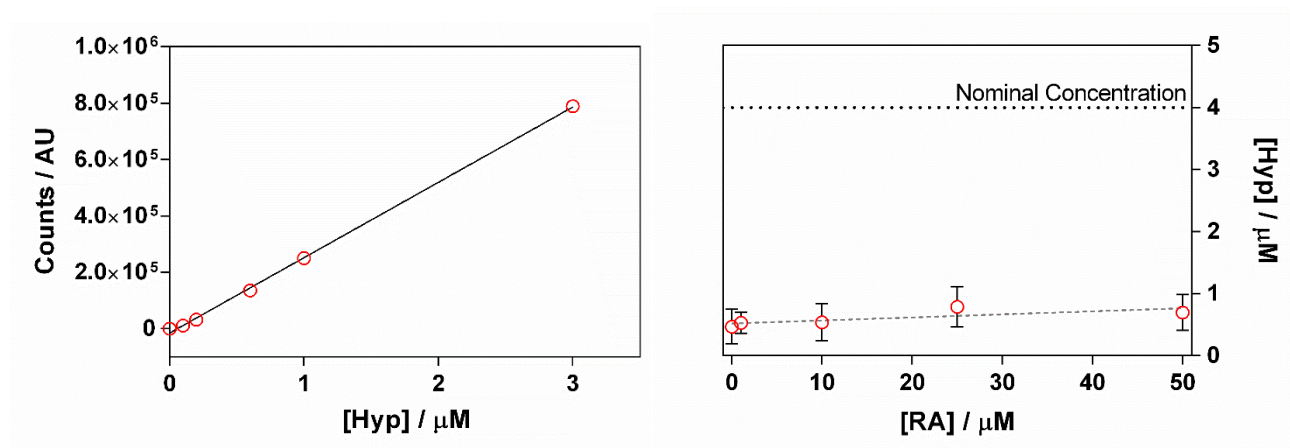

**Figure S7.** Uptake of hypericin by *S. aureus*, quantified by spectrofluorimetry (left), as a function of retinoic acid concentration (right).
